# Supplementary material for: Social Prescribing Programmes to Prevent or Delay Frailty in Community-Dwelling Older Adults
Source: PubMed Central journal article supplement (PMC6960851; doi:10.3390/geriatrics4040065), 2019-11-27
Supplement: geriatrics-04-00065-s001.pdf [file geriatrics-04-00065-s001.pdf]

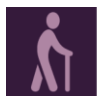

Supplementary File 1: Search strategy presented for MEDLINE

1. (((old or aged or geriat\* or 65+ or "65") and over) or older adults or elder\*).mp. [mp=title, abstract, original title, name of substance word, subject heading word, floating sub-heading word, keyword heading word, organism supplementary concept word, protocol supplementary concept word, rare disease supplementary concept word, unique identifier, synonyms]
2. (frail\* or prefrail or pre-frail).mp. [mp=title, abstract, original title, name of substance word, subject heading word, floating sub-heading word, keyword heading word, organism supplementary concept word, protocol supplementary concept word, rare disease supplementary concept word, unique identifier, synonyms]
3. 1 or 2
4. (community living or community based or free living or freelifing or independent).mp. [mp=title, abstract, original title, name of substance word, subject heading word, floating sub-heading word, keyword heading word, organism supplementary concept word, protocol supplementary concept word, rare disease supplementary concept word, unique identifier, synonyms]
5. 3 and 4
6. (weight management or diet\* or food club or weight loss program\* or weight reduction program\* or lunch club or cooking club or cooking class or cooking course).mp. [mp=title, abstract, original title, name of substance word, subject heading word, floating sub-heading word, keyword heading word, organism supplementary concept word, protocol supplementary concept word, rare disease supplementary concept word, unique identifier, synonyms]
7. ((((((((((psychosocial\* or peer\*) adj3 support\*) or community) adj3 group\*) or wellbeing) adj (service or support)) or psychoeducation\* or social) adj3 (skill\* or support\*)) or self) adj3 help) or computer\*adj3 CBT or timebank\* or befriend\*).mp. or (community adj3 educat\*).ti,ab. or loneliness.mp. or anxiety.mp. or adult learning.mp. [mp=title, abstract, original title, name of substance word, subject heading word, floating sub-heading word, keyword heading word, organism supplementary concept word, protocol supplementary concept word, rare disease supplementary concept word, unique identifier, synonyms]
8. (physical activ\* or swimming or dance classes or yoga or team sport or exercise or group activities or gym-based activities or green gym or gardening clubs or cycling or aqua-therapy or health walks or fitness\*).mp. [mp=title, abstract, original title, name of substance word, subject heading word, floating sub-heading word, keyword heading word, organism supplementary concept word, protocol supplementary concept word, rare disease supplementary concept word, unique identifier, synonyms]
9. 6 or 7 or 8
10. (social prescribing or community referral or referral scheme\* or well-being program\* or wellbeing program\* or exercise referral scheme\*).mp. [mp=title, abstract, original title, name of substance word, subject heading word, floating sub-heading word, keyword heading word, organism supplementary concept word, protocol supplementary concept word, rare disease supplementary concept word, unique identifier, synonyms]
11. 9 and 10
12. 5 and 11
13. limit 12 to randomized controlled trial
